# Supplementary material
Source: PubMed Central journal article supplement (PMC8078869)
Supplement: NIHMS1597455-supplement-Supplementary_Materials.pdf [file NIHMS1597455-supplement-Supplementary_Materials.pdf]

## SUPPLEMENTARY INFORMATION

In this document, we further describe the analyzed skills and include more details on the results of our statistical analyses.

### S.1 Modules and Skills

Supplementary Table 1 includes details on the modules and skills examined.

| Module             | Skill                                      | Subskill                                                                            |
|--------------------|--------------------------------------------|-------------------------------------------------------------------------------------|
| Mindfulness        | Observe <sup>b</sup>                       | Breathing<br>Sounds<br>Visuals<br>Everyday Life                                     |
|                    | Describe <sup>b</sup>                      | Visuals<br>Thoughts<br>Expressions<br>Everyday Life                                 |
|                    | Participate <sup>b</sup>                   | Counting<br>Jumping<br>Laugh Club<br>Saying Words<br>Walking<br>Everyday Life       |
|                    | NonJudgementally <sup>b</sup>              | Observe Judgments<br>Rephrase Judgmental Statements                                 |
|                    | One Mind <sup>b</sup>                      | –                                                                                   |
| Emotion Regulation | Check the Facts <sup>a</sup><br>/Brief CtF | –<br>–                                                                              |
|                    | Opposite Action <sup>a</sup><br>/Brief OA  | –<br>–                                                                              |
|                    | Problem Solve <sup>a</sup><br>/Brief PS    | –<br>–                                                                              |
|                    |                                            |                                                                                     |
| Distress Tolerance | Distract <sup>b</sup>                      | Comparisons<br>Emotions<br>Pushing Away<br>Sensations<br>Thoughts                   |
|                    | Self-Soothe <sup>a</sup>                   | Hearing<br>Smell<br>Taste<br>Touch<br>Vision                                        |
|                    | TIP <sup>b</sup>                           | Intense Exercise<br>Paced Breathing<br>Progressive Muscle Relaxation<br>Temperature |

<sup>a</sup>Skills with both pre- and post-ratings (with which we could calculate skill improvement).

<sup>b</sup>Skills with post-ratings only.

Supplementary Table 1: Modules, skills, and subskills examined in our analyses.

| Finding                                                                              | Estimate | p Value     |
|--------------------------------------------------------------------------------------|----------|-------------|
| DT Distract via Pushing Away vs DT Distract via Comparisons                          | -1.20    | 0.0227      |
| DT Distract via Sensations vs DT Distract via Comparisons                            | -1.43    | 0.0171      |
| M Participate via Saying Words vs DT Distract via Comparisons                        | -1.04    | 0.0104      |
| M Non-Judgementally Observe Judgments vs DT Distract via Pushing Away                | 0.992    | 0.0307      |
| M Non-Judgementally Rephrase Judgmental Statements vs DT Distract via Pushing Away   | 1.25     | 0.0000617   |
| M Non-Judgementally Observe Judgments vs DT Distract via Sensations                  | 1.23     | 0.0302      |
| M Non-Judgementally Rephrase Judgmental Statements vs Distract via Sensations        | 1.49     | 0.000351    |
| M Non-Judgementally Rephrase Judgmental Statements vs Distract via Thoughts          | 0.901    | 0.0472      |
| M Participate via Saying Words vs M Non-Judgementally Observe Judgments              | -0.836   | 0.00468     |
| M Focus On One Thing at a Time vs M Non-Judgementally Rephrase Judgmental Statements | -0.710   | 0.00307     |
| M Describe Visuals vs M Non-Judgementally Rephrase Judgmental Statements             | -0.749   | 0.00234     |
| M Observe Breathing vs M Non-Judgementally Rephrase Judgmental Statements            | -0.819   | 0.00000986  |
| M Observe Sounds vs M Non-Judgementally Rephrase Judgmental Statements               | -0.828   | 0.0000127   |
| M Participate via Saying Words vs M Non-Judgementally Rephrase Judgmental Statements | -1.10    | 0.000000218 |

**Supplementary Table 2: Skill effectiveness: examining pairwise differences in skills for post-ratings. Positive deltas indicate the first skill results in worse post-ratings than the second skill. M=Mindfulness, ER=Emotion Regulation, DT=Distress Tolerance.**

## S.2 Overall Skill Use

In our Tukey test examining overall skill improvement between subskills, the *Emotion Regulation* skill of *Problem Solve* resulted in more improvement than the *Distress Tolerance* skills of *Self-Soothe via Hearing* (by 0.64 points;  $t=-3.252$ ,  $p<0.05$ ), *Self-Soothe via Touch* (by 0.90 points;  $t=-4.388$ ,  $p<0.01$ ), and *Self-Soothe via Vision* (by 0.63 points;  $t=-3.361$ ,  $p<0.05$ ). The *Emotion Regulation* skill *Check the Facts* also resulted in more improvement than the *Distress Tolerance* skill *Self-Soothe via Touch* (by 0.79 points;  $t=-4.108$ ,  $p<0.01$ ).

See Supplementary Table 2 for results of our Tukey test examining overall post-skill rating between subskills.

## S.3 Skill vs. Scale Improvement

For the PHQ-9 model, our Tukey test examining *age bucket* revealed that being under 25 ( $z=3.414$ ,  $p<0.01$ ) and 25-35 ( $z=3.167$ ,  $p<0.01$ ) years old correlates with more improvement than 35-45 years old. Being under 25 ( $z=2.698$ ,  $p<0.05$ ) and 25-35 ( $z=2.869$ ,  $p<0.05$ ) years old also correlates with more improvement than being greater than 45 years old. Our examination of *family bucket* revealed that having zero family members living close correlates with greater improvement than having 1 or 2 ( $z=3.618$ ,  $p<0.01$ ), 3 or 4 ( $z=3.021$ ,  $p<0.05$ ), or more than 4 ( $z=-2.781$ ,  $p<0.05$ ). Finally, the Tukey results for *favorite module* revealed that preferring the *Addiction* module correlates in more improvement than the *Distress Tolerance* module ( $z=3.638$ ,  $p<0.01$ ), the *Emotion Regulation* module ( $z=3.391$ ,  $p<0.01$ ), and the *Mindfulness* module ( $z=3.564$ ,  $p<0.01$ ).

For the OASIS model, we found that being 25-35 correlates with greater improvement than being 35-45 ( $z=2.939$ ,  $p<0.05$ ) or older than 45 ( $z=3.278$ ,  $p<0.01$ ).

Consistent with our other analyses, these models use the buckets defined in Section 3.2 for the variables of *age*, *number of family members close*, and *education*. If these variables are instead treated as continuous, the resulting models yield no significant effects. This discrepancy may be due to a nonlinear relationship to those variables or due to our relatively limited dataset.

## S.4 Models

Supplementary Table 3 presents a list of skill use characteristic features used in predictive modeling. Supplementary Table 4 presents the classifier performance across the four different learning algorithms and various feature sets.

| Feature                              | Description                                                                                               | Type        |
|--------------------------------------|-----------------------------------------------------------------------------------------------------------|-------------|
| Skill ID                             | Unique skill identifier                                                                                   | Categorical |
| Day of week                          | Day of week for skill use                                                                                 | Categorical |
| Time of day                          | Time of day for skill use grouped by morning (6-12), afternoon (12-18), evening (18-24), and night (0-6). | Categorical |
| Consecutive use of any skill         | Boolean indicating whether or not another skill is used within 15 minutes prior to the current skill use  | Categorical |
| Consecutive use of the same skill    | Boolean indicating whether or not the same skill is used within 15 minutes prior to the current skill use | Categorical |
| Cumulative average skill improvement | Cumulative average of skill improvements since the study intake                                           | Numerical   |
| Last improvement                     | Skill improvement of the last used skill (0 for the first skill use)                                      | Numerical   |
| Pre-rating                           | Pre-rating of emotional intensity or distress                                                             | Numerical   |

**Supplementary Table 3: Skill use characteristic features used for training predictive models.**

| Feature set                   | DT            | LR            | GB            | RF            |
|-------------------------------|---------------|---------------|---------------|---------------|
| All                           | 0.721 / 0.628 | 0.643 / 0.665 | 0.705 / 0.699 | 0.659 / 0.632 |
| All but skill                 | 0.62 / 0.457  | 0.636 / 0.616 | 0.64 / 0.565  | 0.663 / 0.648 |
| All but pre-rating            | 0.721 / 0.628 | 0.663 / 0.69  | 0.698 / 0.708 | 0.667 / 0.657 |
| All but mood disorder         | 0.721 / 0.628 | 0.655 / 0.685 | 0.709 / 0.703 | 0.64 / 0.621  |
| All but anxiety disorder      | 0.721 / 0.628 | 0.64 / 0.666  | 0.698 / 0.707 | 0.671 / 0.609 |
| All but education             | 0.721 / 0.628 | 0.643 / 0.671 | 0.671 / 0.703 | 0.698 / 0.677 |
| All but favorite module       | 0.721 / 0.628 | 0.651 / 0.664 | 0.713 / 0.703 | 0.655 / 0.672 |
| All but least favorite module | 0.721 / 0.628 | 0.647 / 0.659 | 0.694 / 0.705 | 0.647 / 0.662 |

**Supplementary Table 4: Predictive model performances (denoted by “test accuracy / test AUC”) across four different learning algorithms—decision tree (DT), logistic regression (LR), gradient boosting (GB), and random forest (RF)—and various feature sets.**
